# Supplementary material for: A Milestone in the Chemical Synthesis of Fe3O4 Nanoparticles: Unreported Bulklike Properties Lead to a Remarkable Magnetic Hyperthermia
Source: PubMed Central journal article supplement (PMC8619619; doi:10.1021/acs.chemmater.1c02654), 2021-11-10
Supplement: cm1c02654_si_001.pdf [file cm1c02654_si_001.pdf]

# SUPPORTING INFORMATION

## **A Milestone in the Chemical Synthesis of Fe<sub>3</sub>O<sub>4</sub> Nanoparticles: Unreported Bulk-like Properties lead to a Remarkable Magnetic Hyperthermia**

*Idoia Castellanos-Rubio<sup>1\*</sup>, Oihane Arriortua<sup>2</sup>, Daniela Iglesias-Rojas<sup>2</sup>, Ander Barón<sup>2</sup>, Irati Rodrigo<sup>1,3</sup>, Lourdes Marcano<sup>4,1</sup>, José S. Garitaonandia<sup>5</sup>, Iñaki Orue<sup>6</sup>, M. Luisa Fdez-Gubieda<sup>1,3</sup>, Maite Insausti<sup>2,3\*</sup>.*

<sup>1</sup>Dpto. Electricidad y Electrónica, Facultad de Ciencia y Tecnología, UPV/EHU, Barrio Sarriena s/n, 48940, Leioa, Spain.

<sup>2</sup>Dpto. Química Inorgánica, Facultad de Ciencia y Tecnología, UPV/EHU, Barrio Sarriena s/n, 48940, Leioa, Spain.

<sup>3</sup>BC Materials, Basque Center for Materials, Applications and Nanostructures, Barrio Sarriena s/n, 48940, Leioa, Spain.

<sup>4</sup>Helmholtz-Zentrum Berlin für Materialien und Energie, Albert-Einstein-Str.15, 12489 Berlin, Germany.

<sup>5</sup>Dpto. Física Aplicada II, Facultad de Ciencia y Tecnología, UPV/EHU, Barrio Sarriena s/n, 48940, Leioa, Spain.

<sup>6</sup>SGIker, Servicios Generales de Investigación, UPV/EHU, Barrio Sarriena s/n, 48940, Leioa, Spain.

## **Table of contents**

**Figure S1:** FTIR spectra of FeO<sub>l</sub> annealed during 15 h, 18 h and 21 h.

**Figure S2.** Thermogravimetry of FeO<sub>l</sub> samples and as-synthesized NPs.

**Figure S3.** The synthesis setup.

**Table S1.** Crystallite sizes of Fe<sub>3</sub>O<sub>4</sub> nanoparticles

**Table S2, S3.** DLS measurements: mean hydrodynamic diameter and Z potential.

**Figure S4.** Dh<sub>N</sub> distribution of Opt<sub>3</sub>-23@PEG sample over time

**Table S4.** Experimental viscosities of D.I. H<sub>2</sub>O, PBS (1x) and Agar (2%).

**Figure S5.** AC hysteresis loops and experimental SAR(H) curves in agar and PBS.

## FTIR spectra of FeOl precursors

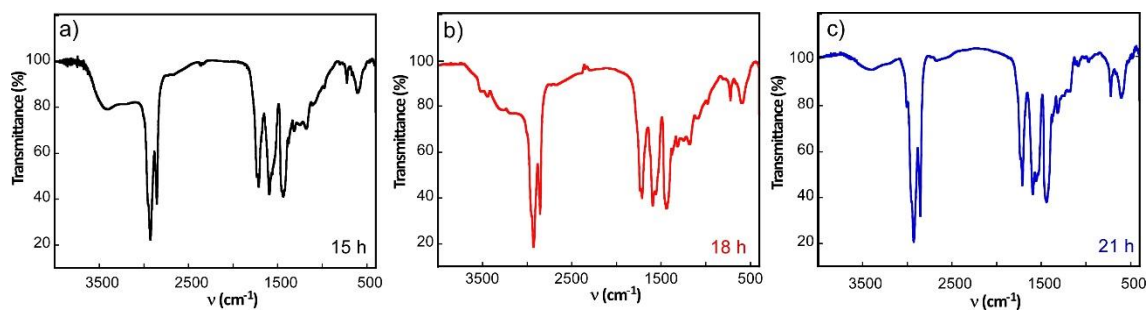

**Figure S1:** FTIR spectra of FeOl dried at 110 °C during a) 15 h, b) 18 h and c) 21 h.

## Thermogravimetric measurements

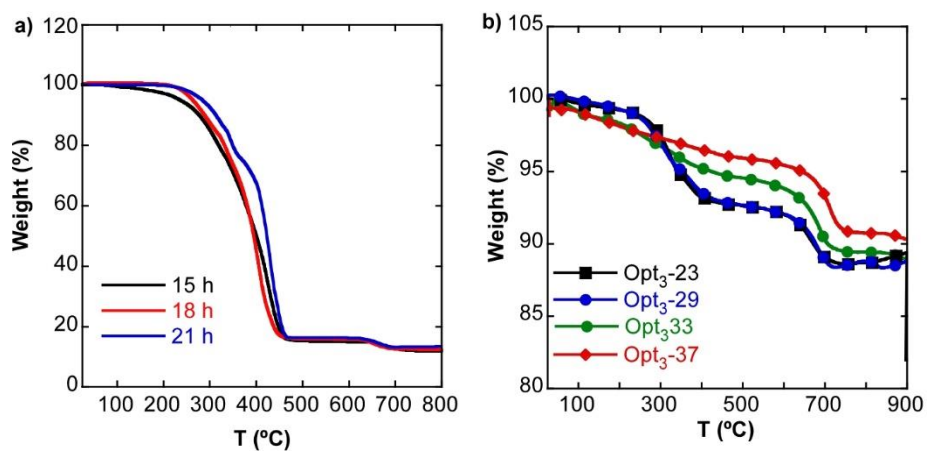

**Figure S2.** Thermogravimetric curves at 10 °C/min and under Ar of a) FeOl samples dried during different times (15, 18 and 21 h) and of b) as-synthesized NPs from Opt<sub>3</sub>-batch.

## The synthesis setup

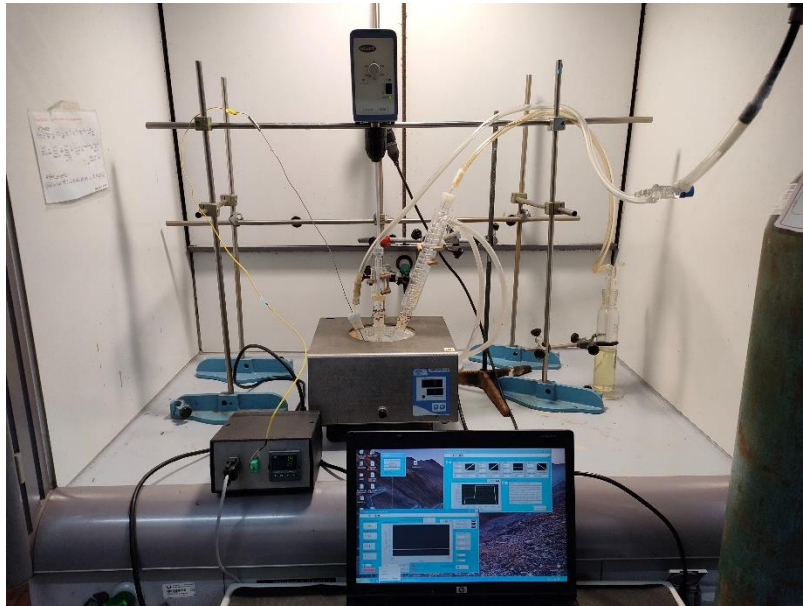

**Figure S3.** Set up used in the chemical synthesis of highly homogeneous and stoichiometric magnetite nanoparticles.

## Crystallite size of Fe<sub>3</sub>O<sub>4</sub> nanoparticles

The crystallite sizes of samples Opt<sub>3</sub>-23, Opt<sub>3</sub>-29, Opt<sub>3</sub>-33 and Opt<sub>3</sub>-37 have been calculated by the deconvolution of the (311) diffraction peak of magnetite, using the Scherrer equation (S1):

$$D = \frac{K\lambda}{B_{structure} \cdot \cos\theta} = \quad (S1)$$

Where  $K$  is the shape factor (0.85-0.95),  $B_{structure} = B_{observed} - B_{instrumental}$  is the full width at half maximum,  $\lambda$  is the X-ray wavelength (in our case =  $(K\alpha_1 + K\alpha_2)/2 = 1.5418\text{\AA}$ ), and  $\theta$  is the peak position.

**Table S1.** Parameters obtained from the deconvolution of (311) of magnetite in samples Opt<sub>3</sub>-23, Opt<sub>3</sub>-29, Opt<sub>3</sub>-33 and Opt<sub>3</sub>-37 and the calculated crystallite size using Scherrer equation.

| Sample               | Diffraction peak | B obs. (°2θ) | B inst. (°2θ) | B estruc. (°2θ) | Peak pos. (°2θ) | Crystallite Size (α) (nm)* |
|----------------------|------------------|--------------|---------------|-----------------|-----------------|----------------------------|
| Opt <sub>3</sub> -23 | 311              | 0.474        | 0.120         | 0.354           | 35.620          | 24 (1)                     |
| Opt <sub>3</sub> -29 | 311              | 0.399        | 0.120         | 0.279           | 35.612          | 30 (2)                     |
| Opt <sub>3</sub> -33 | 311              | 0.368        | 0.120         | 0.248           | 35.599          | 34 (2)                     |
| Opt <sub>3</sub> -37 | 311              | 0.324        | 0.120         | 0.204           | 35.605          | 40 (2)                     |

\*The deviation of the size has been obtained using  $K = 0.85-0.95$

## Hydrodynamic-Size and Zeta-Potential

The measurement of Z Potential and hydrodynamic diameter ( $D_{hN}$ ) for sample Opt<sub>1</sub>-25, Opt<sub>2</sub>-23 and Opt<sub>3</sub>-23 coated with PMAO-PEG ( $M_{WPEG}=10kDa$ ) have been summarized in **Table S2**. The negative Z Potential values come from the free COOH groups in the PMAO backbone. The three samples presents very good colloidal stability with reduced clustering effects.

**Table S2.** Polydispersion Index (PDI), mean hydrodynamic diameter (given in Number ( $D_{hN}$ )) and Z potential (Pz) for sample Opt<sub>1</sub>-25@PEG, Opt<sub>2</sub>-23@PEG and Opt<sub>3</sub>-23@PEG in D.I. H<sub>2</sub>O.

| SAMPLE                   | COATING      | PDI  | $D_{hN}$ (σ)(nm) [H <sub>2</sub> O] | Pz (σ) (mV) [H <sub>2</sub> O] |
|--------------------------|--------------|------|-------------------------------------|--------------------------------|
| Opt <sub>1</sub> -25@PEG | PMAO-PEG-10K | 0.41 | 101 (12)                            | -25.0 (1.0)                    |
| Opt <sub>2</sub> -23@PEG | PMAO-PEG-10K | 0.29 | 78 (5)                              | -8.0 (0.4)                     |
| Opt <sub>3</sub> -23@PEG | PMAO-PEG-10K | 0.25 | 76 (5)                              | -16.0 (0.9)                    |

Sample Opt<sub>3</sub>-23@PEG presents the best stability and a remarkably minimal agglomeration ( $D_{hN} < 100$  nm) in both distillate water and physiological conditions (PBS). Sample Opt<sub>3</sub>-23@PEG dispersed in H<sub>2</sub>O and in PBS (1x) has been stocked in the fridge for over a year and its colloidal properties have been studied.

The DLS analysis of Opt3-23@PEG in 04-06-2020 and in 14-06-2021 are quite equivalent (see **Table S3**), which proves the excellent long-term stability of these nano-platforms both in D.I. H<sub>2</sub>O and in physiological conditions (PBS). In order to better illustrate the small changes of the colloidal properties of Opt3-23@PEG sample over time, the Dh<sub>N</sub> distributions obtained in 2020 and in 2021 have been plotted together and are displayed in **Figure S4**.

**Table S3.** Mean hydrodynamic diameter given in Intensity (Dh<sub>I</sub>), Volume (Dh<sub>V</sub>) and Number (Dh<sub>N</sub>) in D.I. H<sub>2</sub>O and in PBS (1x) and Z potential (Pz) in D.I. H<sub>2</sub>O for sample Opt3-23@PEG. The set of measurements have been repeated one year later to analyze the colloidal stability of the sample.

| SAMPLE                   | Disersion media  | DLS (nm)<br>D <sub>h</sub> (σ) |         |        | Pz (σ)<br>(mV)<br>[H <sub>2</sub> O] | Date       |
|--------------------------|------------------|--------------------------------|---------|--------|--------------------------------------|------------|
|                          |                  | Intensiy                       | Volume  | Number |                                      |            |
| Opt <sub>3</sub> -23@PEG | H <sub>2</sub> O | 202 (10)                       | 111 (6) | 76 (5) | -16 (1)                              | 04-06-2020 |
|                          | PBS              | 199 (8)                        | 122 (4) | 88 (4) |                                      |            |
| Opt <sub>3</sub> -23@PEG | H <sub>2</sub> O | 110 (6)                        | 100 (3) | 89 (4) | -15 (1)                              | 14-06-2021 |
|                          | PBS              | 124 (3)                        | 112 (2) | 98 (2) |                                      |            |

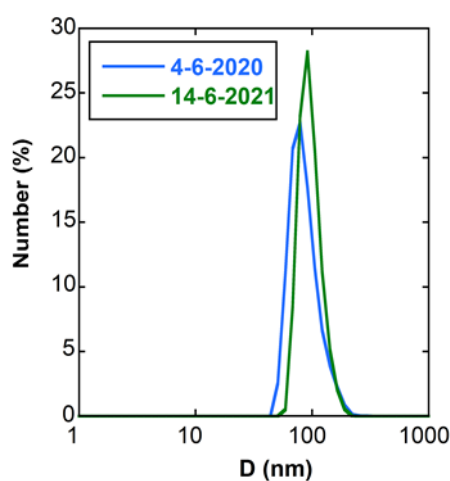

**Figure S4.** Dh<sub>N</sub> distributions of Opt<sub>3</sub>-23@PEG sample dispersed in PBS (1x) in 04-06-2020 and in 14-06-2021.

## Viscosity ( $\mu$ ) of the dispersion media.

Opt<sub>3</sub>-23@PEG sample has been dispersed in three different media:

- 1) Distillate water (D.I. H<sub>2</sub>O, pH=6)
- 2) Phosphate-buffered saline (PBS, 1x, pH=7.4)
- 3) Agar aqueous solution prepared at 2% (w/v).

In order to disperse the NPs in agar, the agar solution is heated to boiling and then the NPs are added. The mixture is stirred until a homogeneous NP-agar dispersion is achieved. Finally, the mixture is cool down to room temperature (RT), where the agar is in solid state presenting a very high viscosity ( $\mu \rightarrow \infty$ ). The gelling temperature of the agar (2%) is  $\approx 40$  °C. The viscosity values of the media have been obtained making use of an AMETEK Brookfield DVST Viscometer and have been summarized in **Table S4** at RT and 50°C.

Since AC magnetometry is carried out at RT, the NPs are immobilized within the solid agar matrix during the measurement. Consequently, it can be concluded that in this media physical orientation effects are impeded.

**Table S4.** Experimental viscosities (cP) of the three dispersion media: D.I. H<sub>2</sub>O, PBS (1x) and Agar (2%).

| Media                 | T= 22°C              | T= 50°C |
|-----------------------|----------------------|---------|
| D.I. H <sub>2</sub> O | 1.11                 | 0.95    |
| PBS (1x)              | 1.26                 | 0.85    |
| Agar 2%               | $\rightarrow \infty$ | 31.75   |

*\*gelling T of agar (2%) $\approx 40$  °C*

## AC loops of sample Opt<sub>3</sub>-23@PEG in physiological solution and agar

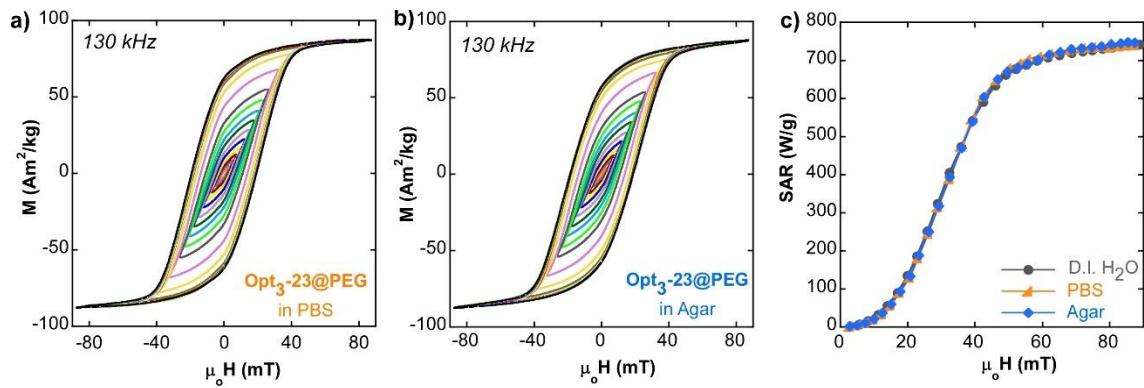

**Figure S5.** AC hysteresis loops of Opt<sub>3</sub>-23@PEG in a) physiological solutions (PBS x1) and b) agar at 132 kHz. c) The corresponding experimental SAR vs field curves.
